# Supplementary material for: Multi–omic analysis of signalling factors in inflammatory comorbidities
Source: PubMed Central journal article supplement (PMC6266935; doi:10.1186/s12859-018-2413-x), 2018-11-30
Supplement: 12859_2018_2413_MOESM1_ESM.pdf [file 12859_2018_2413_MOESM1_ESM.pdf]

## Additional File 1

Gene expression datasets of inflammatory diseases used in Step 1

| Disease                          | Expression Data Source               | Cell Type                                       |
|----------------------------------|--------------------------------------|-------------------------------------------------|
| Osteoporosis                     | GSE7158                              | Osteoclast                                      |
| HIV infection                    | GSE18464                             | Osteoclast                                      |
| HIV infection with HAART therapy | GSE5220                              | Osteoclast                                      |
| Osteoporosis                     | GSE35958                             | Osteoblast                                      |
| HIV                              | GSE6740                              | CD4+ T cells                                    |
| Rheumatoid arthritis             | GSE1919                              | Synovial tissue                                 |
| Osteoarthritis                   | GSE1919                              | Synovial tissue                                 |
| Paget's disease                  | GSE30806, GSE9006                    | Quadriceps muscle, PBMC                         |
| Measles                          | GSE29106, GSE29107, GSE5808          | Bone marrow, PBMC                               |
| Type 1 Diabetes                  | GSE9006                              | PBMC                                            |
| Type 2 Diabetes                  | GSE9006                              | PBMC                                            |
| Renal disorder                   | GSE29060                             | HT-29 cell line                                 |
| Osteosarcoma                     | GSE21257                             | Bone                                            |
| Multiple myeloma                 | GSE7390, GSE8977, GSE33450, GSE14548 | Breast tumor, Mesenchymal stem cell, Epithelium |
| Breast cancer                    | GSE7390, GSE8977, GSE33450, GSE14548 | Breast tumor, Mesenchymal stem cell, Epithelium |
| Periodontitis                    | GSE9006                              | PBMC                                            |
