# Supplementary material for: Multi–omic analysis of signalling factors in inflammatory comorbidities
Source: PubMed Central journal article supplement (PMC6266935; doi:10.1186/s12859-018-2413-x), 2018-11-30
Supplement: 12859_2018_2413_MOESM2_ESM.pdf [file 12859_2018_2413_MOESM2_ESM.pdf]

## Additional File 2

DNA methylation and gene expression datasets of inflammation related diseases used in Step 2

| Disease                      | Abbreviation | Methylation Data Source | Expression Data Source | Cell Type              |
|------------------------------|--------------|-------------------------|------------------------|------------------------|
| Allergy                      | Allergy      | GSE50387                | GSE50387               | CD4+ T cell            |
| Asthma                       | Asthma       | GSE52074                | GSE18965               | Airway epithelial cell |
| Ulcerative Colitis           | Colitis      | GSE32149                | GSE3365                | PBMC                   |
| Crohns' Disease              | Crohn        | GSE32149                | GSE3365                | PBMC                   |
| Rheumatoid Arthritis         | RA           | GSE42861                | GSE15573               | PBMC                   |
| Chronic Fatigue Syndrome     | CFS          | GSE59489                | GSE14577               | PBMC                   |
| Systemic Lupus Erythematosus | SLE          | GSE59250                | GSE46907               | CD14+                  |
| Colon Cancer                 | ColonCancer  | TCGA (Batch 76)         | TCGA (Batch 28 and 76) | Colon                  |
| Type 2 Diabetes              | T2D          | Dayeh et al. [1]        | GSE41762               | Pancreatic islets      |

## References

- [1] Tasnim Dayeh, Petr Volkov, Sofia Salö, Elin Hall, Emma Nilsson, Anders H Olsson, Clare L Kirkpatrick, Claes B Wollheim, Lena Eliasson, Tina Rönn, et al. Genome-wide dna methylation analysis of human pancreatic islets from type 2 diabetic and non-diabetic donors identifies candidate genes that influence insulin secretion. *PLoS Genet*, 10(3):e1004160, 2014.
